1 **Kangaroo Mother Care prior to clinical stabilisation: Implementation barriers and**  
2 **facilitators reported by caregivers and health care providers in Uganda.**

3 Victor S. Tumukunde<sup>1,4</sup>, Joseph Katongole<sup>1</sup>, Stella Namukwaya<sup>1</sup>, Melissa M. Medvedev<sup>2,3,4</sup>,  
4 Moffat Nyirenda<sup>1,4</sup>, Cally J. Tann<sup>2,4,5</sup> Janet Seeley<sup>1,6</sup> and Joy E. Lawn<sup>2,4</sup>

5 Authors

- 6 1. Medical Research Council/Uganda Virus Research Institute and London School of Hygiene  
7 & Tropical Medicine Uganda Research Unit, PO Box 49, Entebbe, Uganda.
- 8 2. Maternal, Adolescent, Reproductive, & Child Health Centre, London School of Hygiene &  
9 Tropical Medicine, Keppel Street, London WC1E 7HT, UK.
- 10 3. Department of Paediatrics, University of California San Francisco, 550 16<sup>th</sup> Street, Box  
11 1224, San Francisco, CA 94158, USA
- 12 4. Faculty of Epidemiology and Population Health, London School of Hygiene & Tropical  
13 Medicine, Keppel Street, London WC1E 7HT, UK.
- 14 5. Department of Neonatal Medicine, University College London, 235 Euston Road, London  
15 NW1 2BU, UK.
- 16 6. Faculty of Public Health and Policy, London School of Hygiene & Tropical Medicine,  
17 Tavistock Place, London WC1H 9SH, UK.

18 **Corresponding author: Victor S. Tumukunde**

19 Address: Medical Research Council/Uganda Virus Research Institute and LSHTM Uganda  
20 Research Unit, PO Box 49, Entebbe, Uganda

21 Email: [Victor.tumukunde@mrcuganda.org](mailto:Victor.tumukunde@mrcuganda.org)

22

23

## 24 **Abstract**

25 Kangaroo mother care (KMC) is an evidence-based method to improve newborn  
26 survival. However, scale-up even for stable newborns has been slow, with reported  
27 barriers to implementation. We examined facilitators and barriers to initiating KMC  
28 before stabilisation amongst neonates recruited to the OMWaNA study in Uganda.

29 A qualitative sub-study was conducted during the OMWaNA randomized controlled trial  
30 examining the mortality effect of KMC prior to stabilisation amongst newborns (700-2000g).

31 At the four trial site hospitals, focus group discussions (FGDs) were conducted with  
32 caregivers, and separately with healthcare providers and in-depth interviews (IDIs) with  
33 caregivers (admitted/recently discharged), and key informant interviews (KII) with hospital  
34 administrators/neonatal healthcare providers. The WHO Building Blocks was used to  
35 guide thematic analysis.

36 Eight FGDs (4 caregivers, 4 healthcare workers), 41 caregiver IDIs (26 mothers, 8  
37 grandmothers and 7 fathers) and 23 KIIs were conducted. Key themes based on the  
38 building blocks were family and community support and involvement, health workforce,  
39 medical supplies and commodities, infrastructure and design, financing, and health  
40 facility leadership. We found availability of an additional family member in the hospital,  
41 and support from healthcare workers, were facilitators for KMC before stability. The  
42 caregiver's positive attitude towards KMC facilitated KMC practice but was impeded by  
43 the lack of knowledge on the benefits of KMC or how to perform it. Implementation  
44 barriers included: Fear of inadvertently causing harm to the newborn, inadequate space

45 to perform KMC in the neonatal care unit and a limited number of trained healthcare  
46 workers coupled with insufficient medical supplies.

47 In the Ugandan government hospital setting, the presence of a family member in the  
48 hospital, adequate provision of healthcare workers knowledgeable in supporting KMC  
49 prior to stability, and adequate space for KMC beds where neonatal care is being  
50 delivered, can enable implementation of KMC before stability.

51

52 **Key words:** Early Kangaroo Mother Care, neonatal care, preterm and low birthweight.

## 53 **Introduction**

54 Globally an estimated 2.3 million neonatal deaths occurred in 2021(1), with over 80%  
55 occurring in small vulnerable newborns, primarily due to prematurity and/or being small-  
56 for-gestational age (2). Major mortality reductions could be achieved by improving  
57 facility-based care of small and sick neonates in low- and middle-income country (LMIC)  
58 settings(3-5). Kangaroo mother care (KMC), as a component of this small and sick  
59 newborn care, is associated with decreased mortality among clinically stable newborns  
60 (6-8). However there are several barriers to KMC implementation within and outside the  
61 healthcare system(9).

62 KMC is a package including early, continuous, and prolonged skin-to-skin contact  
63 (SSC), usually with the mother, promotion of exclusive breastmilk feeding, early hospital  
64 discharge, and adequate support and close follow-up at home (10). KMC has been  
65 found to be associated with decreased mortality, sepsis, hypothermia, hypoglycaemia,  
66 and length of hospital stay (6). KMC also has multiple benefits for the neonate and their  
67 family including improved duration of breastfeeding, improved growth outcomes (11,  
68 12), supporting maternal-infant bonding and improved maternal mood (13).

69 A WHO-led trial recently reported a 25% reduction in mortality within 28 days among  
70 neonates born weighing 1000-1799g who received KMC immediately after birth, relative  
71 to those who received standard care with KMC after stabilisation(3). Following this,  
72 WHO updated their KMC recommendation for newborns from the birth weight of  
73  $\leq 2000\text{g}$ , initiated as soon as newborns are clinically stable (14), to KMC for all

74 newborns weighing <2500 grams (g), even prior to clinical stability(15). The WHO has  
75 since released updated guidelines recommending KMC for all low birth weight (LBW)  
76 newborns, that should be initiated as soon as possible after birth and should be given  
77 for 8-24 hours (15).

78 Despite clear evidence of impact in improving survival among newborns(16), scale-up of  
79 KMC, even for stable newborns, has been slow, hindered by a lack of national  
80 investment to implement at scale, and hard to track given lack of coverage data in  
81 routine health information systems(17, 18). The majority of mothers of LBW newborns  
82 are committed to KMC, satisfied with the results of weight gain and interested in  
83 continuing KMC at home (19). However, barriers to KMC provision amongst stable  
84 newborns have been reported at both the health facility and community level(9, 20, 21).  
85 Studies have found that a lack of beds and space, privacy issues, inadequate caregiver  
86 education, insufficient staff and monitoring devices, and difficulties motivating mothers  
87 to devote time to KMC, were common barriers to KMC practice in facilities (22-27).  
88 Maternal factors, such as fatigue, depression, and postpartum pain, especially after a  
89 caesarean section, may reduce uptake (9, 28, 29). The considerable time needed to  
90 provide continuous and extended KMC has been reported as a barrier for mothers and  
91 their families, due to competing household and work responsibilities, lack of money for  
92 transportation, and time required for commuting (29, 30). At the community level,  
93 barriers to KMC adoption and continuity include stigma and guilt related to having a  
94 preterm newborn, gender roles in childcare, and adherence to traditional newborn  
95 practices(22, 30-32).

96 Most published studies on KMC barriers and facilitators have been carried out amongst  
97 stable newborns. Yet in the wake of the new WHO recommendations that KMC should  
98 be initiated as soon as possible after birth, there is need to understand the facilitators  
99 and barriers of KMC implementation prior to clinical stability. One study that examined  
100 the feasibility of KMC amongst newborns ( $\geq 700\text{g}$  to  $\leq 2000\text{g}$ ) before clinical stability in a  
101 level-2 neonatal care unit in Uganda found that KMC was acceptable, but with  
102 reservations concerning infant monitoring and space availability (22).

103 The OMWaNA trial (“Operationalising Kangaroo Mother Care amongst low birthweight  
104 neonates in Uganda”) recruited 2228 neonates  $\leq 2000\text{g}$  between 2019-22, to a  
105 randomized controlled trial examining the effect of KMC ‘prior to stability’ on mortality  
106 and morbidity outcomes in five government hospital facilities in Uganda (33). This trial  
107 offered an important opportunity to explore, for the first time, the barriers and facilitators  
108 of KMC implemented prior to stability amongst small vulnerable newborns (33). In this  
109 paper we examine the barriers and facilitators to initiating KMC prior to clinical stability  
110 from different stakeholders’ perspectives.

## 111 **Methods**

### 112 *Study design and setting*

113 This was a qualitative study embedded within the OMWaNA trial (33). This randomised  
114 trial was conducted in the WHO level-2 neonatal units of five government hospitals in  
115 Uganda from 09-10-2019 to 31-07-2022. The participating hospitals were Entebbe  
116 Regional Referral Hospital, Jinja Regional Referral Hospital, Masaka Regional Referral  
117 Hospital, Iganga District Hospital and Kawempe National Referral Hospital. Entebbe  
118 Hospital was not utilised for this sub-study because of early discontinuation due to  
119 becoming the national Covid-19 referral hospital and the neonatal unit being restricted.  
120 The trial recruited neonates with birthweight of 700-2000g` prior to clinical stability, which  
121 was defined as receiving  $\geq 1$  of the following treatments: oxygen support, continuous  
122 positive airway pressure (CPAP), intravenous (IV) fluids indicated for neonates unable  
123 to take enteral feeds, therapeutic antibiotics, and phenobarbital medication used to treat  
124 neonatal seizures. Pragmatic infrastructure improvements were done prior to trial  
125 initiation, to allow for caregivers' beds in the neonatal care units enabling safe  
126 implementation of the intervention of KMC prior to clinical stability (34).

### 127 *Participant Recruitment*

128 Caregivers were selected from among those who were either still admitted or already  
129 discharged with available phone contacts. Identified participants were contacted and  
130 given an appointment to return to the hospital for the interviews. The selected  
131 healthcare worker participants included the research assistants for the OMWaNA trial

132 and the government healthcare workers working in the neonatal care units who were on  
133 duty at the time of the interview or willing to come to the hospital on their off-duty days.  
134 The hospital administrators were found in their offices on the appointed days for the  
135 interviews. Written informed consent was first sought from all participants. An impartial  
136 witness was used during the consenting of non-literate caregivers as per the ICH-GCP  
137 (International Council for Harmonisation of Good Clinical Practice) guidelines.

### 138 *Data collection and management*

139 Focus group discussions (FGD) were held with caregivers, and separately with  
140 healthcare providers, at four of the OMWaNA trial sites. In addition, in-depth interviews  
141 (IDI) with caregivers and key informant interviews (KII) with neonatal healthcare  
142 providers and hospital administrators were conducted. The interviews were conducted  
143 by a trained social science research assistant and the lead investigator, and audio  
144 recorded. In the event the participant declined the use of the audio recorder, notes  
145 were taken, and the interview was written up from those notes. FGDs, IDIs and KIIs  
146 were conducted in Luganda, Lusoga and English languages using structured topic  
147 guides which were piloted on 4 caregivers and 3 nurses from one hospital. In total; 8  
148 FGDs (4 healthcare worker, 4 caregiver); 41 caregiver IDIs; 19 healthcare worker KIIs  
149 (paediatricians, medical officers, nurses); and 4 hospital administrator KIIs, were  
150 conducted.

151 All data were stored on secure servers at the MRC/UVRI & LSHTM Uganda Research  
152 Unit. The scripts and audio files were stored on a computer as password protected files.



153 No names or other direct identifiers appeared in the transcripts or recordings; only  
154 unique identification codes were used to ensure confidentiality.

### 155 *Data analysis*

156 Data were analysed using a thematic content approach. The analysis involved  
157 familiarization with the data, identifying codes and themes, developing a coding  
158 framework, and applying it to all of the data. The principal investigator together with the  
159 social scientist read all the transcripts, generated themes and developed the final  
160 coding framework; the coding of all scripts was managed using Nvivo 12.

### 161 *Theoretical framing*

162 The WHO Health Systems Building Blocks for Strengthening of Health Systems (35)  
163 has been adapted and applied to the provision of small and sick newborn care (SSNC).  
164 This adapted version describes health system in terms of seven components (building  
165 blocks) notably; family centred care at the core and then infrastructure,  
166 leadership/governance, financing, health workforce, medicines/supplies and health  
167 information systems(36, 37). We utilised these Building Blocks already adapted for  
168 SSNC as a framework around which to inform our thematic analysis(36). The Building  
169 Blocks align to WHO norms for care of small and sick newborns (15) and also the more  
170 recent WHO/UNICEF 10 core components for SSNC, of which seven are these Health  
171 Systems Building Blocks (38) however, health information systems was not linked to the  
172 generated themes from the interviews. Therefore, only six components were used. We  
173 mapped our generated themes to this version of the conceptual framework to guide our

174 analysis of facilitators and barriers to delivery of KMC prior to stability, as shown in  
 175 figure 1. In the results section we present the findings of both the barriers and  
 176 facilitators by each main theme in turn.

## 177 Results

178 The FGDs, IDI and KIIs, were conducted across the 4 hospitals as indicated in table 1.  
 179 The barriers and facilitators were categorized under five themes, as described above,  
 180 which are i) family and community support and involvement, ii) health workforce, iii)  
 181 medicines and supplies iv) infrastructure, and v) health facility leadership. The main  
 182 themes and sub-themes are summarized in table 2.

183 **Table 1: Participants interviewed from different hospitals.**

|                                | Persons        | Hospital-1 |        | Hospital-2 |        | Hospital-3 |         | Hospital-4 |        |
|--------------------------------|----------------|------------|--------|------------|--------|------------|---------|------------|--------|
| Hospital type                  |                | National   |        | Regional   |        | Regional   |         | District   |        |
| Study arm                      |                | KMC        | Contro | KMC        | Contro | KMC        | Control | KMC        | Contro |
| <b>Number of HCWs FGD</b>      |                | 1          |        | 1          |        | 1          |         | 1          |        |
| <b>Number of Caregiver FGD</b> |                | 1          |        | 1          |        | 1          |         | 1          |        |
| <b>Caregiver IDIs</b>          | Mothers        | 3          | 2      | 3          | 4      | 3          | 2       | 4          | 5      |
|                                | Grand Mothers  | 2          | 0      | 1          | 1      | 1          | 1       | 2          | 0      |
|                                | Fathers        | 2          | 0      | 2          | 0      | 0          | 1       | 2          | 0      |
| <b>KII with HCWs</b>           | Neonatal       | 2          |        | 4          |        | 2          |         | 4          |        |
|                                | Medical        | 1          |        | 0          |        | 1          |         | 1          |        |
|                                | Paediatricians | 1          |        | 1          |        | 1          |         | 1          |        |

|  |                |   |   |   |   |
|--|----------------|---|---|---|---|
|  | Administrators | 1 | 1 | 1 | 1 |
|--|----------------|---|---|---|---|

184

185 **Table 2. Overview of the barriers and facilitators of KMC prior to clinical stability.**

|                                          | <b>Facilitators</b>                                                                                                                                                                                                                                      | <b>Barriers</b>                                                                                                                                                                                                                                              |
|------------------------------------------|----------------------------------------------------------------------------------------------------------------------------------------------------------------------------------------------------------------------------------------------------------|--------------------------------------------------------------------------------------------------------------------------------------------------------------------------------------------------------------------------------------------------------------|
| <b>Main themes</b>                       | <b>Sub-themes</b>                                                                                                                                                                                                                                        | <b>Sub-themes</b>                                                                                                                                                                                                                                            |
| Family & Community support & involvement | <ul style="list-style-type: none"> <li>Financial support from family member</li> <li>Presence of family member in the hospital</li> <li>Provision of meals for the KMC mothers</li> </ul>                                                                | <ul style="list-style-type: none"> <li>Caregiver being alone in the hospital.</li> <li>No other person to do KMC</li> <li>Cultural beliefs</li> <li>Fear of hurting the small baby</li> <li>Fear of handling the baby</li> <li>Maternal morbidity</li> </ul> |
| Health workforce                         | <ul style="list-style-type: none"> <li>Supportive &amp; encouraging HCWs to caregivers.</li> <li>Availability of adequate number of trained HCWs in preterm care</li> <li>Educating caregivers on KMC practice and its benefits</li> </ul>               | <ul style="list-style-type: none"> <li>Lack of knowledge on benefits of KMC and how to perform it.</li> <li>Rude and unsupportive HCW</li> <li>Fear of unstable baby deteriorating</li> </ul>                                                                |
| Medical supplies & devices               | <ul style="list-style-type: none"> <li>Availability of medicine for care of sick newborns and timely treatment</li> <li>Availability of medical equipment for monitoring sick newborns</li> <li>Availability of adequate oxygen supply points</li> </ul> | <ul style="list-style-type: none"> <li>Buying medicines from outside the hospital</li> <li>Sick newborns missing treatment</li> </ul>                                                                                                                        |
| Infrastructure and design                | <ul style="list-style-type: none"> <li>Availability of adequate space with privacy</li> <li>Adequate number of KMC beds</li> <li>Clean environment and bathrooms/toilets</li> </ul>                                                                      | <ul style="list-style-type: none"> <li>Lack of privacy</li> <li>Unclean bathrooms</li> <li>Overcrowding</li> </ul>                                                                                                                                           |
| Health facility leadership               | <ul style="list-style-type: none"> <li>Adequate staffing for KMC care</li> <li>Training of HCW in preterm care</li> <li>Clear KMC guidelines / policies</li> </ul>                                                                                       | <ul style="list-style-type: none"> <li>Lack of involvement by the leadership</li> </ul>                                                                                                                                                                      |
| Financing                                | <ul style="list-style-type: none"> <li>Adequate finances to support recruitment of healthcare worker and infrastructure improvement.</li> </ul>                                                                                                          | <ul style="list-style-type: none"> <li>Not improving budgetary allocation to meet the demand</li> </ul>                                                                                                                                                      |

186 ***Family and community support and involvement***

187 *Facilitators:*

188 Family and community support and involvement referred to the perception and reality  
189 that the caregiver's family members assisted her or him to perform KMC. This support in  
190 the care of newborns had a positive impact on the continuity of KMC practice. Family  
191 members, especially fathers, provided financial support, and grandmothers and sisters  
192 helped with chores in the hospital such as washing clothes and going out to buy  
193 necessities. Family members who had had experience of taking care of a preterm infant  
194 previously, encouraged caregivers to perform KMC. The positive attributes of family  
195 support were mentioned by both the healthcare workers and caregivers, especially  
196 mothers. One mother, for example, mentioned the food which family members brought  
197 as very helpful, and confidence in financial support once home with the new baby, kept  
198 her focussed on performing KMC. Caregivers were grateful to have someone as a  
199 substitute KMC provider such as grandmothers, husbands, and sisters. One mother  
200 described how she would ask the baby's father to help her by putting the baby into  
201 KMC. She went on to say, '*some days he does put them, and you have to thank God*  
202 *when he wears the Kangaroo wrap*'. One father also described his involvement in the  
203 care of the newborn in a positive light: "*I wouldn't refuse to do what I have been told to*  
204 *do to enable my baby to add weight because I also want him to gain weight*". Thus, the  
205 presence of a family member in the hospital to support the mother was fundamental for  
206 continuity of KMC prior to stability.

207 Both mothers and fathers were motivated and hopeful about KMC practice. During one  
208 FGD, a mother said, *“For you to benefit from the Kangaroo method, you have to be*  
209 *patient and be ready to face all the challenges and accept all what the health workers*  
210 *tell you to use or stop using”*. The fathers who were interviewed expressed their  
211 determination to perform KMC following the explanation of the benefits. One father  
212 commented:

213 *“The fact that I want my baby to be alive gives me hope and strength to do whatever I*  
214 *am told to do as long as it will help him. I have to follow what I am told so that I get what*  
215 *I want from it. I wouldn’t refuse to do what I have been told to do to enable my baby to*  
216 *add weight because I also want him to gain weight.”*

217 *Barriers:*

218 Some families lacked the finances to support the hospital stay, which undermined the  
219 continuity of KMC prior to stability. Given that most families depended on fathers as the  
220 source of finances for upkeep during the hospital stay, they played a role in decision  
221 making as elaborated in the quote by one mother below.

222 *“The father of the baby had stopped giving us money for food, remember I was in ward*  
223 *eight for a whole month so when they told us to buy syrups for the baby, we called him*  
224 *because we didn’t have money anymore, but he told us that he didn’t have money*  
225 *anymore and that he was tired of the situation even the money for food we didn’t know*  
226 *where to get it from”*.

227 In such situations of financial constraint, families wanted the mother and baby  
228 discharged quickly, as mentioned by one healthcare worker: *“they want to leave early  
229 because of their financial status”*. Poorer families may have wanted to support the  
230 mother but were unable to do so, thus impeding KMC continuity.

231 Other families actively discouraged KMC by advising caregivers to use alternative  
232 methods of warming preterm babies, such as using hot water in jerricans and using a  
233 charcoal stove under the bed: *“the community usually think of other methods like using  
234 a hot charcoal stove or putting jerry cans filled with hot water around the baby”*, said one  
235 father. A more fundamental barrier to KMC was the belief that preterm infants cannot  
236 survive and that KMC is a waste of time. This belief led to some fathers withdrawing all  
237 the financial support for the upkeep of the mother and child during the hospital stay and  
238 demanding discharge. One healthcare worker said: *“a father seeing the baby on  
239 oxygen believes the baby is dead and demands for discharge”*. However, some mothers  
240 got financial support from other sources rather than the fathers. These included other  
241 family members and credit facilities as mentioned in the quotes below.

242 *“A family member might come and give you 50,000/-, at that time, the focus immediately  
243 goes back to the child. You send the 20,000/- to help at home and you remain with the  
244 30,000/- to help at the hospital” (Mother).*

245 *“The mother got a loan from a certain SACCO [Savings and Credit Cooperative  
246 Organization] she belongs to. She has not paid them yet” (Father).*

247 The combination of lack of financial support, and inadequate knowledge on survival of  
248 preterm infants and how KMC benefits unstable small and sick newborns impeded KMC  
249 continuity greatly.

250 There were other cultural barriers to KMC, such as prohibitions on a woman's in-laws  
251 seeing her undressed, or a grandmother helping to practice KMC in front of her son-in-  
252 law. One father commented: *"the grandmother to the baby cannot undress and do*  
253 *kangaroo in the presence of the baby's father"*, and he went on to say that *"a mother*  
254 *cannot do KMC in the presence of her father in-law"*. Also, beliefs surrounding the  
255 gender roles were mentioned, with one father saying that: *"the community can't imagine*  
256 *us men putting our babies in the chest for a while"* meaning that this is supposed to be  
257 done by the mother. This deprived the mother of the help of a substitute KMC provider  
258 in case of twins or maternal morbidity.

259 Fatigue, tiredness, and maternal morbidity especially after caesarean section were  
260 mentioned as some of the maternal concerns that limited KMC prior to stabilization. This  
261 was described by one healthcare worker: *"there is no one to do Kangaroo especially for*  
262 *a mother who has been operated upon and as a caretaker she is still weak and*  
263 *receiving medication"*. One mother also described the difficulties related with the skin-  
264 to-skin position, *"I experienced back ache when I put the child in my chest while in one*  
265 *position facing up, I also get chest pain because of putting the child in the chest for*  
266 *long."* These maternal related factors that impeded KMC might be alleviated with the  
267 presence of a family member to help in performing KMC during the hospital stay.

268 **Health workforce**

269 *Facilitators:*

270 Healthcare workers' availability and ability to health educate, counsel, and encourage  
271 caregivers to perform KMC, facilitated its implementation prior to stability. One female  
272 caregiver said, "*the healthcare workers made me get used [to Kangaroo]. Another*  
273 *caregiver commented: "the nurse told me that her last born was also a preterm baby*  
274 *and encouraged me that my baby will grow normally if I continue putting the baby in my*  
275 *chest daily."*

276 Enabling the caregivers to understand the advantages of KMC had a positive impact on  
277 the continuity of KMC practice. A male caregiver described the information he had  
278 received from a healthcare worker:

279 *She [the health care worker] told us to put the baby in the chest on bare skin and*  
280 *tie the baby to get warmth, that because this baby is still very young it still needs*  
281 *the mother's warmth so when you put the baby in the chest it will be as if they are*  
282 *in the womb. My wife started putting the baby and she also told me that even if we*  
283 *go back home, we should continue putting the baby in the chest even I the*  
284 *husband I should help my wife to put the baby in the chest and we did, we put the*  
285 *baby in the chest like for thirty minutes."*

286 This provision of clear information was helpful to the caregivers, and several caregivers  
287 expressed their appreciation for the information they were given.



288 Within the KMC ward, peer support from other mothers who shared their KMC  
289 experiences also promoted the practice. One mother described the encouragement she  
290 and the new mother had received when they were facing challenges associated with  
291 KMC.

292 *“During that time people would come in and they had brought their babies for*  
293 *review, and they would tell us their stories and encouraged us to be strong that*  
294 *also their babies were like that, which made us believe.”*

295 With such encouragement fears were alleviated, and caregivers began to practice KMC.  
296 One mother said: *“at first, I saw that it was a burden but after I believed that the preterm*  
297 *baby is my own and I want the baby to survive so I must do whatever they tell me”*.

298 Continuous counselling on the benefits of KMC and encouragement of caregivers to  
299 perform KMC by healthcare workers and peers was seen as a motivating factor.

300 *Barriers:*

301 Low staffing levels of healthcare workers limited their capacity to monitor and support  
302 implementation of KMC prior to stabilization as described by one of the healthcare  
303 workers, *“shortage of staff makes monitoring hard because sometimes we are*  
304 *overwhelmed by the numbers”*. This in turn limits the healthcare worker’s zeal to support  
305 the implementation of KMC prior to stabilisation.

306 Healthcare workers mentioned that the lack of understanding of KMC procedures and  
307 its benefits by the caregivers was an impediment to KMC implementation. One

308 healthcare worker observed that: *“there is not enough education about what Kangaroo*  
309 *is”*. This led to poor practice of KMC with no skin-to-skin contact as described by  
310 another healthcare worker: *“you find the mother dressed, and the baby is dressed while*  
311 *in KMC position”*. With low staffing levels and associated worker load, the HCWs are  
312 unable to support caregivers fully with health education and the necessary counselling,  
313 thus impeding the KMC practice in the hospital.

314 Fear by the healthcare workers that caregivers do not know how to do KMC and that  
315 they might harm the unstable baby was another hinderance. One healthcare worker  
316 said that *“in my opinion, the other fear is lack of knowledge and skills gap [by*  
317 *caregivers] of doing KMC”*. She went on to give an experience of a fatal outcome: *“we*  
318 *got a preterm in that they pretended to put the baby in KMC but instead killed the baby*  
319 *[healthcare worker narrating how a caregiver performed KMC wrongly and the newborn*  
320 *died]”*. This fear was augmented by the fact that KMC prior to stability was a new  
321 intervention to the healthcare workers and they had no prior training in the procedure  
322 before the trial. This was particularly the case for the regular hospital staff who were not  
323 trial specific healthcare workers.

324 There were some healthcare workers who continued to hold negative attitude towards  
325 KMC due to a lack of adequate knowledge of KMC among unstable pre-term babies.  
326 The healthcare workers need to be *“educated because not all of them know how to take*  
327 *care of the neonates, so they should be trained”* as expressed by one neonatal care unit  
328 in-charge. The caregivers interpreted the poor attitude of HCWs as poor ‘customer’ care

329 which discouraged them from practicing KMC at the health facility. This was described  
330 by one mother that *“nurses should change, they reach a point where they shout at us  
331 yet even us, we are not yet used to the babies and still scared”*.

332 In some instances, caregivers received conflicting instructions from the HCWs which is  
333 likely to be due to lack of training. For example, one mother said, *“a doctor tells you to  
334 give the baby 20 millilitres of breast milk but don’t breast feed and another HCW comes  
335 and complain as to why you are not breast feeding the baby and tells you to breast  
336 feed”*.

337 Healthcare workers’ lack of knowledge on KMC prior to stability could be the cause of  
338 this communication gap between the healthcare workers and the caregivers which  
339 discouraged the implementation of KMC prior to stabilisation.

#### 340 ***Medical supplies and commodities***

##### 341 *Facilitators:*

342 The availability of medicine and timely treatment enabled the caregivers to perform  
343 KMC with the hope that the newborns would survive. This was described by one  
344 caregiver: *“the babies would receive treatment through cannulas all the time until we left  
345 when the babies had improved, they gave them good treatment”*. This gave the  
346 caregivers enough time to perform KMC as they did not have to stop KMC to go and  
347 buy the medicines.

348 Healthcare workers felt that having functioning equipment was an important facilitator  
349 for the care of small and sick newborns, “*we also need functional monitors because we*  
350 *need to monitor these babies*”. The equipment enabled them to monitor the sick  
351 newborn’s progress while in KMC.

352 *Barriers:*

353 An inadequate supply of medicines and other essentials for small and sick newborn  
354 care was a barrier as described by one mother that “*Musawo (healthcare worker) might*  
355 *send you for medicine and you fail to get it*”. This created uncertainty about the survival  
356 of the newborns and interrupted the skin-to-skin practice which demoralised the  
357 caregivers.

358 The lack of an adequate number of oxygen supply outlets on the ward hindered KMC  
359 prior to stability in one hospital, as babies had to be nursed from shared oxygen points  
360 away from KMC beds. This meant that newborns who needed oxygen support had to  
361 halt KMC and be transferred to oxygen outlet points as elaborated by one healthcare  
362 worker: “*Sometimes when you initiate a baby on KMC, you find that we don’t have*  
363 *oxygen and we have to use the few concentrators we have for all the babies*”.

364 A lack of functioning equipment for monitoring the vital signs of sick newborns was also  
365 reported as a barrier. Without vital monitoring, the healthcare workers feared that the  
366 newborn might die unnoticed while in skin-to-skin position as described by one  
367 healthcare worker: “*you might find this baby in KMC, dead*”.

368 There was also the reported fear by the healthcare workers and caregivers of  
369 disconnecting oxygen tubes and vital sign monitors from the newborns while performing  
370 KMC.

371 One mother expressed her fear of the machines:

372 *“Since it is the one helping my baby to breathe, what if you touch it yet you do not know*  
373 *how to put it right and instead you be the one to kill your own baby”.* Another caregiver  
374 thought that *“the oxygen tubes would come out of the nose and the baby fails to*  
375 *breathe”.* A grandmother concurred with this view: *“when the baby is on oxygen it is not*  
376 *possible to do KMC because the baby has tubes in the nose, how can you carry the*  
377 *baby without those tubes coming out?”.* Some healthcare workers also feared that *“the*  
378 *mother might take-off the baby from oxygen while putting the baby in the chest because*  
379 *the nurse has told them to put babies in kangaroo and baby might stop breathing”.*

380 The fear of harming the baby is a crucial barrier to implementation of KMC prior to  
381 stability.

## 382 **Infrastructure and design**

### 383 *Facilitators:*

384 The availability of space and beds for practicing KMC on wards was reported in one  
385 hospital to have encouraged the caregivers to continue with KMC prior to stability.  
386 Caregivers in that site reported privacy on the KMC ward as a motivator to continue with  
387 the KMC practice as compared to the general wards: *“every parent who is doing*

388 *Kangaroo has their own bed even Nalongo [mother of twins] was given two beds and*  
389 *she has enough space to do Kangaroo.”* Room for KMC with beds and privacy for the  
390 mothers greatly facilitated implementation of KMC prior to stability.

391 *Barriers:*

392 The lack of cleanliness in the hospitals and the washrooms was another hindrance  
393 reported at two of the hospitals. The poor state of the toilets and the inability of the  
394 hospital to clean the gowns worn by the KMC mothers was reported as a barrier too.  
395 This was expressed by one caregiver: “*uncleanliness in your environment for example*  
396 *when you enter a dirty place, or you don’t wash hands, but you come and touch the*  
397 *baby”* are some of the limiting factors for the continued stay in the hospital.

398 Inadequate space that led to overcrowding in the KMC ward and babies sharing  
399 incubators in instances where they had to return the babies to the warmer or incubator  
400 made the caregivers worry about the health of their newborns. Caregivers worried about  
401 the spread of infection through the sharing of medical devices and equipment. One  
402 caregiver described how her baby was sharing a vital sign monitoring machine with  
403 other babies, “*sometimes, they would remove it from my baby and put it on another*  
404 *baby, then bring it back after some time, they should increase on the amount of*  
405 *equipment at the hospital”.*

406 One healthcare worker intimated that “*we don’t have space where to put these mothers*  
407 *to practice KMC”.* Another healthcare worker said that “*they would even tell us they*  
408 *want to go home since they have been discharged from the maternity ward and*

409 *wondered why we can't discharge them*". The lack of adequate infrastructure hindered  
410 the continuity of KMC prior to stability.

#### 411 ***Health facility leadership***

412 Healthcare workers from one of the hospitals reported a lack of adequate involvement  
413 by hospital leadership which hindered full scale capacity building in terms of staff  
414 training and supply of other resources for KMC implementation. This was expressed by  
415 a healthcare worker who rated hospital administration involvement to be: "*almost 20%*  
416 *support and that is the provision of those four beds and the oxygen*" and was quick to  
417 add that "*we actually need people to push them to understand KMC so that they can*  
418 *help us*".

#### 419 ***Financing***

420 The hospital leadership we interacted with acknowledged the ever-increasing demand  
421 for neonatal care services amidst limited resources. The administrators in all four  
422 hospitals mentioned low staffing levels, limited space for adequate KMC ward and an  
423 insufficient budget allocation; as described by one administrator; "*we are operating in a*  
424 *very old staff structure even when the numbers [of patients] have increased, if we have*  
425 *30 midwives and three duties how many can work per shift?*" For implementation of  
426 KMC prior to stability to be successful, there is need for increased funding to support  
427 infrastructure improvement and increase the staffing levels especially for the nurses.

428 We have described above the identified facilitators and barriers of KMC prior to  
429 stabilisation, which are both for general KMC implementation and for specific KMC prior

430 to stability. It is clear from our findings that the successful implementation of KMC  
431 depends on the willingness of caregivers and healthcare workers to practice it, and the  
432 provision of adequate facilities in hospitals to support KMC.

### 433 **Discussion**

434 This qualitative study presents insights for the implementation of KMC prior to stability  
435 from the perspective of the caregivers, healthcare providers and hospital administrators  
436 in four neonatal care units in Uganda. The important facilitators identified included:  
437 presence of a family member in the hospital as a substitute KMC provider, availability of  
438 vital signs monitoring devices, adequate oxygen supply points and adequate number of  
439 staff trained in KMC prior to stability. The important barriers included: maternal  
440 morbidity, fear of hurting the unstable newborn, fear of disconnecting oxygen and  
441 unstable baby deteriorating, absence of supplies for care of sick newborn, healthcare  
442 workers' lack of knowledge in KMC prior to stability, lack of adequate space for KMC  
443 beds within the neonatal care unit and inadequate involvement of the hospital  
444 leadership.

445 Family support and involvement as a facilitator of KMC has been reported in other  
446 studies among stable neonates which postulated that, competing activities like  
447 household chores are a hinderance to continuity of KMC (39), in this study we found  
448 that activities like taking care of the laundry during the hospital stay and going to buy  
449 food interfered with care. However, an important hindrance was the absence of  
450 medicines for SSNC necessitating caregivers to move outside of the health facility to



451 buy these medicines specifically hindered the continuity of KMC prior to stability. The  
452 presence of a family member in the hospital to help with these errands allowed the  
453 mother to perform KMC continuously, a finding corroborated in the work of Smith et al.  
454 (31). In our study, other family members also helped in performing KMC in case of twins  
455 or maternal morbidity. Thus, the barrier to KMC prior to stability due to maternal  
456 morbidity, fatigue and tiredness could be alleviated by allowing a family member to  
457 perform KMC on behalf of the mother. This facilitator has been reported in other studies  
458 at the community level and facility level where the sister, husband or mother-in-law  
459 helped to perform KMC at home or at the health facility (20, 27). Research findings also  
460 show that, the presence of a companion in the hospital facilitates promotion of KMC and  
461 strengthens moral support for the mothers (25). In practical terms, facilitating KMC also  
462 requires space and washrooms and possibly financial support for families.

463 We found that cultural beliefs and practices were a barrier to immediate KMC practice  
464 echoing findings from studies of KMC among stable neonates (31, 40, 41). Although  
465 health education for mothers on the benefits of KMC tended to improve on the  
466 acceptability of the practice(22, 31), mothers tend not to have enough power in their  
467 family to repudiate their family members' beliefs (42). Given that parents of preterm  
468 babies desire more information than what is provided normally (43), investing in health  
469 education of these parents is likely to dispel the belief surrounding the survival of these  
470 preterm infants and thus promote KMC prior to stability. This is in line with the WHO  
471 recommendations that families of LBW infants should be given extra support to care for  
472 their infants. This support may include education, counselling, discharge preparation

473 and peer support (15). Such interventions should also target the older generations of  
474 the family unit that is, the mothers-in-law and grandmothers, who do not find KMC to be  
475 appropriate (44).

476

477 The low staffing levels and an insufficient number of trained healthcare workers in small and  
478 sick newborn care inhibits the implementation of KMC at the health facilities. This is  
479 because the healthcare workers felt that they do not have enough time to educate  
480 caregivers on KMC and they believed that these babies required close monitoring which  
481 was hard given the low staffing levels. This has been described in another study in which  
482 nurses believed that supporting the mothers was important but a lack of staff could not allow  
483 them to provide such supportive care (29, 45, 46). If the healthcare workers would  
484 choose peer mothers on the KMC ward to support the new mothers in doing KMC, this  
485 would increase on the information sharing and subsequent uptake of the intervention  
486 without straining the already over-worked healthcare workers. This is because, support  
487 from peer caregivers has demonstrated to be important in facilitating KMC practice (21,  
488 47).

489 We found that mothers fear the clinical environment especially the monitoring machines,  
490 oxygen, and intravenous lines. First-time mothers particularly fear to touch their own  
491 vulnerable babies, demonstrating the great need for support from the healthcare workers as  
492 reported in other studies (21, 45). For the implementation of KMC prior to stability to  
493 succeed, there needs to be a trained healthcare worker to champion the training of other

494 healthcare workers and who will in turn support the caregiver trainings. This mirrors what  
495 was found by Lee et al.(48), who observed that when a healthcare worker who served as a  
496 promoter of KMC in a facility leaves, it increases the difficulty of educating other staff  
497 members on the practice of skin to skin care (48). With the training, the perceived fear of  
498 harming the baby by both healthcare workers and caregivers will likely be alleviated and  
499 hence facilitate KMC prior to stability as some studies have found that inadequate training in  
500 KMC led to nurses having conflicting knowledge of duration of skin-to-skin contact and are  
501 hesitant to use KMC for infants with catheters, whether intravenous or umbilical (49). There  
502 were similar findings in this study where caregivers received conflicting instructions from  
503 the HCWs which was likely due to knowledge gap in care of small and sick newborns.

504 Space for KMC beds with privacy and clean sanitary facilities was found in our study to be a  
505 motivator for continuity of KMC prior to stability. Crowding and insufficient space has been a  
506 cause of hastened discharge from the health facilities with conventional KMC (21, 50),  
507 coupled with a lack of privacy and discomfort with being undressed in the presence of  
508 strangers (28, 51). For the implementation of KMC prior to stabilization to occur,  
509 infrastructure remodelling is crucial to create space that can accommodate adult beds within  
510 the neonatal care units with good sanitary facilities for caregivers (34). In addition, these  
511 facilities require an adequate number of oxygen supply points to support unstable newborns  
512 during KMC.

513 Support from the hospital management in terms of adequate staff allocation, training,  
514 availability of medical supplies and treatment guidelines was described as an important  
515 facilitator of KMC prior to stability. The same was reported by Jieya et al.,(40) that provision

516 of necessary equipment, KMC rooms and identification of nurses to specialize in KMC  
517 coupled with routine supervision from hospital management, was an incentive for the  
518 healthcare workers to continue implementing KMC(21, 40, 52). The same is likely to  
519 facilitate the implementation of KMC prior to stabilization. However, the hospital managers  
520 blame the lack of resources that have failed them to recruit more healthcare workers and  
521 improve infrastructure as the main hinderances to KMC implementation.

## 522 **Strength and limitations**

523 The main strength of the study is that it has drawn on the rich body of primary qualitative  
524 data using KII, IDI and FGD, providing information that can help policymakers in the  
525 implementation of the new WHO guidelines that recommend immediate KMC. This is the  
526 first multi-site study to look at the barriers and facilitators of KMC prior to stability from the  
527 perspective of the healthcare workers and the caregivers. The study covered 4 health  
528 facilities at different levels of care that is, national referral, regional referral and district  
529 hospital which increases the generalizability of the findings. The limitations of this study are  
530 that we had a limited number of male caregivers (fathers) participating and thus we could  
531 not get their views on paternal involvement in care of preterm babies, we sampled on the  
532 basis of availability which introduced some bias in our sampling. In addition, we were not  
533 able to capture the detailed demographic description of the respondents for further  
534 categorization of the responses.

535

536

537 **Conclusion and recommendation**

538 The presence of a family member as a substitute KMC provider, recruitment, and  
539 training of healthcare workers in care of small and sick newborns, who will in turn  
540 support the families through education and counselling on KMC prior to stability are  
541 crucial for implementation of immediate KMC. Resource mobilisation for infrastructural  
542 remodelling to expand the existing neonatal care units to be able to accommodate  
543 mothers' bed for KMC is foundational for implementing KMC prior to stability with  
544 respect for families and health workers.

545

546

547

## 548 **Acknowledgements**

549 Most importantly, we thank the mothers, newborns, and families who participated in this  
550 study. We give huge appreciation to the neonatal unit nurses, doctors, and staff at,  
551 Iganga, Jinja, Kawempe, and Masaka Hospitals for their participation and dedication  
552 throughout the study. We also thank Salama Kasoga for assisting with data collection.

## 553 **Ethical Issues**

554 Participants gave informed consent before participation in the study and all the collected  
555 information was used with the observance of the confidentiality rules. The ethical  
556 approval was obtained from Uganda Virus Research Institute ethics committee and the  
557 London School of Hygiene and Tropical Medicine research ethics committee.

## 558 **Conflict of Interest**

559 The authors declare no conflict of interest.

## 560 **Authors' Contributions**

561 VST conceptualised this qualitative study, wrote the protocol, drafted the tools, analysed  
562 and interpreted the data, and wrote the first draft of the manuscript. MMM, CJT MN and  
563 JEL reviewed the protocol, JS reviewed the interview tools and the methods section of  
564 the protocol. VST, JK and SN conducted the interviews, transcribed the scripts, coded  
565 and analysed the data. MMM, CJT, JS, and JEL interpreted the data and critically  
566 revised the manuscript. All authors reviewed the manuscript and approved the final  
567 version.

568 **References**

- 569 1. UN-IGME. Levels & Trends in Child Mortality. Report 2022. New York: UNICEF;  
570 2023
- 571 2. Lawn JE, Blencowe H, Oza S, You D, Lee AC, Waiswa P, et al. Every Newborn:  
572 progress, priorities, and potential beyond survival. *The Lancet*. 2014;384(9938):189-  
573 205.
- 574 3. Lawn JE, Davidge R, Paul VK, von Xylander S, de Graft Johnson J, Costello A,  
575 et al. Born too soon: care for the preterm baby. *Reproductive health*. 2013;10(1):S5.
- 576 4. English M, Karumbi J, Maina M, Aluvaala J, Gupta A, Zwarenstein M, Opiyo N.  
577 The need for pragmatic clinical trials in low and middle income settings—taking essential  
578 neonatal interventions delivered as part of inpatient care as an illustrative example.  
579 *BMC medicine*. 2016;14:1-7.
- 580 5. Moxon SG, Lawn JE, Dickson KE, Simen-Kapeu A, Gupta G, Deorari A, et al.  
581 Inpatient care of small and sick newborns: a multi-country analysis of health system  
582 bottlenecks and potential solutions. *BMC pregnancy and childbirth*. 2015;15:1-19.
- 583 6. Conde-Agudelo A, Díaz-Rossello JL. Kangaroo mother care to reduce morbidity  
584 and mortality in low birthweight infants. *Cochrane Database of Systematic Reviews*.  
585 2016(8).

- 586 7. Boundy EO, Dastjerdi R, Spiegelman D, Fawzi WW, Missmer SA, Lieberman E,  
587 et al. Kangaroo mother care and neonatal outcomes: a meta-analysis. *Pediatrics*.  
588 2016;137(1):e20152238.
- 589 8. Bhutta ZA, Das JK, Rizvi A, Gaffey MF, Walker N, Horton S, et al. Evidence-  
590 based interventions for improvement of maternal and child nutrition: what can be done  
591 and at what cost? *The lancet*. 2013;382(9890):452-77.
- 592 9. Chan G, Bergelson I, Smith ER, Skotnes T, Wall S. Barriers and enablers of  
593 kangaroo mother care implementation from a health systems perspective: a systematic  
594 review. *Health policy and planning*. 2017;32(10):1466-75.
- 595 10. WHO. Kangaroo mother care: a practical guide Geneva: WHO; 2003 [Available  
596 from: [http://www.who.int/maternal\\_child\\_adolescent/documents/9241590351/en/](http://www.who.int/maternal_child_adolescent/documents/9241590351/en/).
- 597 11. Sharma D, Farahbakhsh N, Sharma S, Sharma P, Sharma A. Role of kangaroo  
598 mother care in growth and breast feeding rates in very low birth weight (VLBW)  
599 neonates: a systematic review. *The journal of maternal-fetal & neonatal medicine : the*  
600 *official journal of the European Association of Perinatal Medicine, the Federation of Asia*  
601 *and Oceania Perinatal Societies, the International Society of Perinatal Obstetricians*.  
602 2019;32(1):129-42.
- 603 12. Nazir S, Mubashar A, Naeem B, Riaz M, Aman L, Salman N. Role of Kangaroo  
604 Mother Care in Growth and Breast Feeding Rates in Very Low Birth Weight (VLBW)  
605 Neonates. *Pakistan Journal of Medical & Health Sciences*. 2023;17(02):777-.



- 606 13. Athanasopoulou E, Fox JR. Effects of kangaroo mother care on maternal mood  
607 and interaction patterns between parents and their preterm, low birth weight infants: a  
608 systematic review. *Infant mental health journal*. 2014;35(3):245-62.
- 609 14. WHO. WHO recommendations on interventions to improve preterm birth  
610 outcomes [Internet]. Geneva; 2015. Available from:  
611 [http://apps.who.int/iris/bitstream/10665/183037/1/9789241508988\\_eng.pdf](http://apps.who.int/iris/bitstream/10665/183037/1/9789241508988_eng.pdf) 2015.
- 612 15. WHO. Recommendations for care of the preterm or low birth weight infant.  
613 Geneva: WHO; 2022. Report No.: 978-92-4-005826-2 (electronic version).
- 614 16. Conde-Agudelo A, Diaz-Rossello JL. Kangaroo mother care to reduce morbidity  
615 and mortality in low birthweight infants. *The Cochrane database of systematic reviews*.  
616 2016(8):CD002771.
- 617 17. Vesel L, Bergh AM, Kerber KJ, Valsangkar B, Mazia G, Moxon SG, et al.  
618 Kangaroo mother care: A multi-country analysis of health system bottlenecks and  
619 potential solutions. *BMC Pregnancy and Childbirth*. 2015;15(S5).
- 620 18. Lawn JE, Mwansa-Kambafwile J, Horta BL, Barros FC, Cousens S. 'Kangaroo  
621 mother care'to prevent neonatal deaths due to preterm birth complications. *International  
622 journal of epidemiology*. 2010;39(suppl\_1):i144-i54.

- 623 19. Parikh S, Banker D, Shah U, Bala D. Barriers in implementing community based  
624 kangaroo mother care in low income community. *NHL Journal of Medical Sciences*.  
625 2013;2(1):36-8.
- 626 20. Mustikawati IS, Pratomo H, Martha E, Murty AI, Adisasmita AC. Barriers and  
627 facilitators to the implementation of Kangaroo Mother Care in the community-A  
628 qualitative study. *Journal of Neonatal Nursing*. 2020;26(2):109-14.
- 629 21. Kinshella MW, Hiwa T, Pickerill K, Vidler M, Dube Q, Goldfarb D, et al. Barriers  
630 and facilitators of facility-based kangaroo mother care in sub-Saharan Africa: a  
631 systematic review. *BMC Pregnancy & Childbirth*. 2021;21(1):176.
- 632 22. Morgan MC, Nambuya H, Waiswa P, Tann C, Elbourne D, Seeley J, et al.  
633 Kangaroo mother care for clinically unstable neonates weighing  $\leq 2000$  g: Is it feasible at  
634 a hospital in Uganda? *Journal of global health*. 2018;8(1).
- 635 23. Ferrarello D, Hatfield L. Barriers to skin-to-skin care during the postpartum stay.  
636 *MCN: The American Journal of Maternal/Child Nursing*. 2014;39(1):56-61.
- 637 24. Heinemann AB, Hellström-Westas L, Hedberg Nyqvist K. Factors affecting  
638 parents' presence with their extremely preterm infants in a neonatal intensive care  
639 room. *Acta Paediatrica*. 2013;102(7):695-702.

- 640 25. Bergh A-M, Davy K, Otai CD, Nalongo AK, Sengendo NH, Aliganyira P.  
641 Evaluation of kangaroo mother care services in Uganda. Washington D.C. and  
642 Kampala: Save the Children; 2012.
- 643 26. Chisenga JZ, Chalanda M, Ngwale M. Kangaroo Mother Care: A review of  
644 mothers' experiences at Bwaila hospital and Zomba Central hospital (Malawi).  
645 Midwifery. 2015;31(2):305-15.
- 646 27. Naloli M, Ssenyonga LV, Kagoya EK, Nteziyaremye J, Nekaka R. Kangaroo  
647 Mother Care: a qualitative study of the practice and experiences of mothers of preterm  
648 neonates in a tertiary teaching hospital in Eastern Uganda. International Journal for  
649 Research in Health Sciences and Nursing. 2021;7(11):1890.
- 650 28. Blomqvist YT, Frolund L, Rubertsson C, Nyqvist KH. Provision of Kangaroo  
651 Mother Care: supportive factors and barriers perceived by parents. Scandinavian  
652 journal of caring sciences. 2013;27(2):345-53.
- 653 29. Suitor C. Kangaroo mother care: A literature review of barriers and facilitators to  
654 implementation in the neonatal intensive care unit. Journal of Neonatal Nursing.  
655 2023;29(2):245-52.
- 656 30. Chan GJ, Labar AS, Wall S, Atun R. Kangaroo mother care: a systematic review  
657 of barriers and enablers. Bulletin of the World Health Organization. 2016;94(2):130.

- 658 31. Smith ER, Bergelson I, Constantian S, Valsangkar B, Chan GJ. Barriers and  
659 enablers of health system adoption of kangaroo mother care: a systematic review of  
660 caregiver perspectives. *BMC Pediatrics*. 2017;17(1):35.
- 661 32. Waiswa P, Nyanzi S, Namusoko-Kalungi S, Peterson S, Tomson G, Pariyo GW.  
662 'I never thought that this baby would survive; I thought that it would die any time':  
663 perceptions and care for preterm babies in eastern Uganda. *Tropical Medicine &*  
664 *International Health*. 2010;15(10):1140-7.
- 665 33. Medvedev MM, Tumukunde V, Mambule I, Tann CJ, Waiswa P, Canter RR, et al.  
666 Operationalising kangaroo Mother care before stabilisation amongst low birth Weight  
667 Neonates in Africa (OMWaNA): protocol for a randomised controlled trial to examine  
668 mortality impact in Uganda. *Trials*. 2020;21(1):126.
- 669 34. Medvedev MM, Tumukunde V, Kirabo-Nagemi C, Greco G, Mambule I, Katumba  
670 K, et al. Process and costs for readiness to safely implement immediate kangaroo  
671 mother care: a mixed methods evaluation from the OMWaNA trial at five hospitals in  
672 Uganda. *BMC health services research*. 2023;23(1):1-16.
- 673 35. WHO. Everybody's business--strengthening health systems to improve health  
674 outcomes: WHO's framework for action. Geneva: WHO; 2007. Report No.: 9241596074.
- 675 36. NEST360 U. Newborn toolkit [www.newborntoolkit.org](http://www.newborntoolkit.org)2023 [

- 676 37. Dickson KE, Simen-Kapeu A, Kinney MV, Huicho L, Vesel L, Lackritz E, et al.  
677 Every Newborn: health-systems bottlenecks and strategies to accelerate scale-up in  
678 countries. *The Lancet*. 2014;384(9941):438-54.
- 679 38. Expert W-U, on Small CC. A comprehensive model for scaling up care for small  
680 and/or sick newborns at district level—based on country experiences presented at a  
681 WHO-UNICEF expert consultation. *Journal of Global Health*. 2023;13.
- 682 39. Leonard A, Mayers P. Parents' lived experience of providing kangaroo care to  
683 their preterm infants. *Health SA Gesondheid*. 2008;13(4):16-28.
- 684 40. Yue J, Liu J, Williams S, Zhang B, Zhao Y, Zhang Q, et al. Barriers and  
685 facilitators of kangaroo mother care adoption in five Chinese hospitals: a qualitative  
686 study. *BMC public health*. 2020;20(1):1234.
- 687 41. Bilal SM, Tadele H, Abebo TA, Tadesse BT, Muleta M, F WG, et al. Barriers for  
688 kangaroo mother care (KMC) acceptance, and practices in southern Ethiopia: a model  
689 for scaling up uptake and adherence using qualitative study. *BMC Pregnancy &*  
690 *Childbirth*. 2021;21(1):25.
- 691 42. Hariati S, Sutomo R, McKenna L, Reisenhofer S, Lusmilasari L, Febriani AD.  
692 Indonesian mothers' beliefs on caring practices at home for preterm babies after  
693 hospital discharge: A qualitative study. *Journal for Specialists in Pediatric Nursing*.  
694 2021;26(3):e12330.

- 695 43. Brazy J, Anderson BH, Becker P, Becker M. How parents of premature infants  
696 gather information and obtain support. *Neonatal network*. 2001;20(2):41-8.
- 697 44. Kambarami R. Kangaroo care and multiple births. *Annals of Tropical Paediatrics*.  
698 2002;22(1):107-8.
- 699 45. Negarandeh R, Hassankhani H, Jabraeili M, Abbaszadeh M, Best A. Health care  
700 staff support for mothers in NICU: a focused ethnography study. *BMC Pregnancy and*  
701 *Childbirth*. 2021;21(1):1-12.
- 702 46. Kinshella MW, Salimu S, Chiwaya B, Chikoti F, Chirambo L, Mwaungulu E, et al.  
703 "So sometimes, it looks like it's a neglected ward": Health worker perspectives on  
704 implementing kangaroo mother care in southern Malawi. *PLoS ONE*.  
705 2020;15(12):e0243770.
- 706 47. Kurniawati, Rustina Y, Budiati T. Peer Support Increases Maternal Confidence,  
707 Kangaroo Mother Care Implementation and Weight Gain in LBW Infants.  
708 *Comprehensive child and adolescent nursing*. 2019;42(sup1):252-60.
- 709 48. Lee HC, Martin-Anderson S, Dudley RA. Clinician perspectives on barriers to and  
710 opportunities for skin-to-skin contact for premature infants in neonatal intensive care  
711 units. *Breastfeeding Medicine*. 2012;7(2):79-84.

- 712 49. Lemmen D, Fristedt P, Lundqvist A. Kangaroo care in a neonatal context:  
713 parents' experiences of information and communication of nurse-parents. The open  
714 nursing journal. 2013;7:41.
- 715 50. Bergh A-M, Manu R, Davy K, Van Rooyen E, Asare GQ, Williams JKA, et al.  
716 Translating research findings into practice—the implementation of kangaroo mother care  
717 in Ghana. Implementation science. 2012;7:1-9.
- 718 51. Nahidi F, Tavafian SS, Haidarzade M, Hajizadeh E. Opinions of the midwives  
719 about enabling factors of skin-to-skin contact immediately after birth: a descriptive  
720 study. Journal of family & reproductive health. 2014;8(3):107.
- 721 52. Maniago JD, Almazan JU, Albougami AS. Nurses' kangaroo mother care practice  
722 implementation and future challenges: An integrative review. Scandinavian Journal of  
723 Caring Sciences. 2020;34(2):293-304.
- 724
